# Supplementary material for: Integrated single-cell and bulk RNA sequencing analysis identified pyroptosis-related signature for diagnosis and prognosis in osteoarthritis
Source: PubMed Central journal article supplement (PMC10584952; doi:10.1038/s41598-023-44724-0), 2023-10-18
Supplement: 41598_2023_44724_MOESM1_ESM.pdf [file 41598_2023_44724_MOESM1_ESM.pdf]

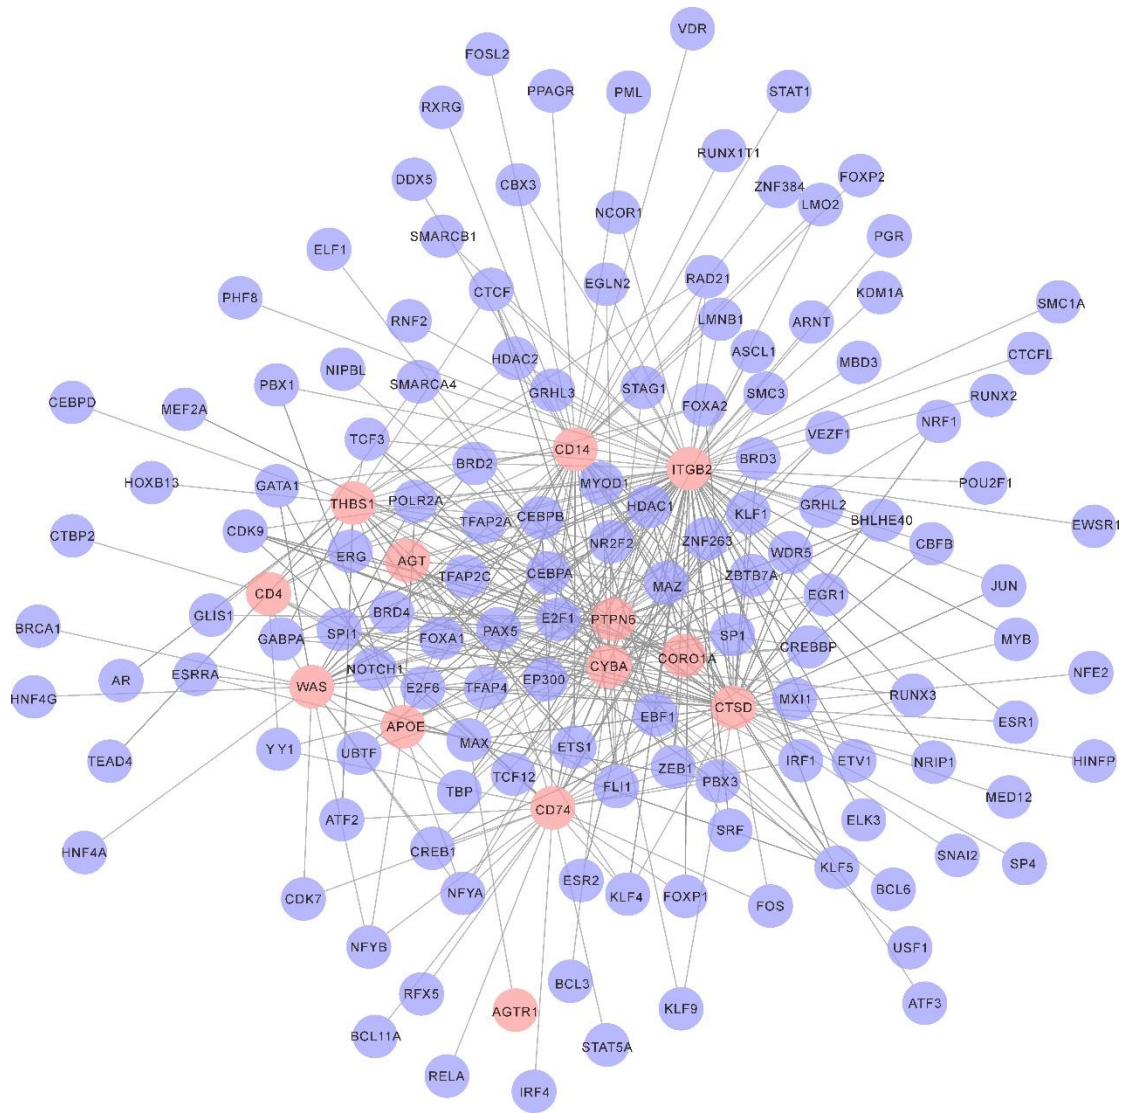

**Supplementary Fig. S2.** Construction of mRNA-TF interaction network. The mRNA-TF interaction network of hub genes, the red oval block is mRNA, the blue oval block is TF. (TF: Transcription factors)

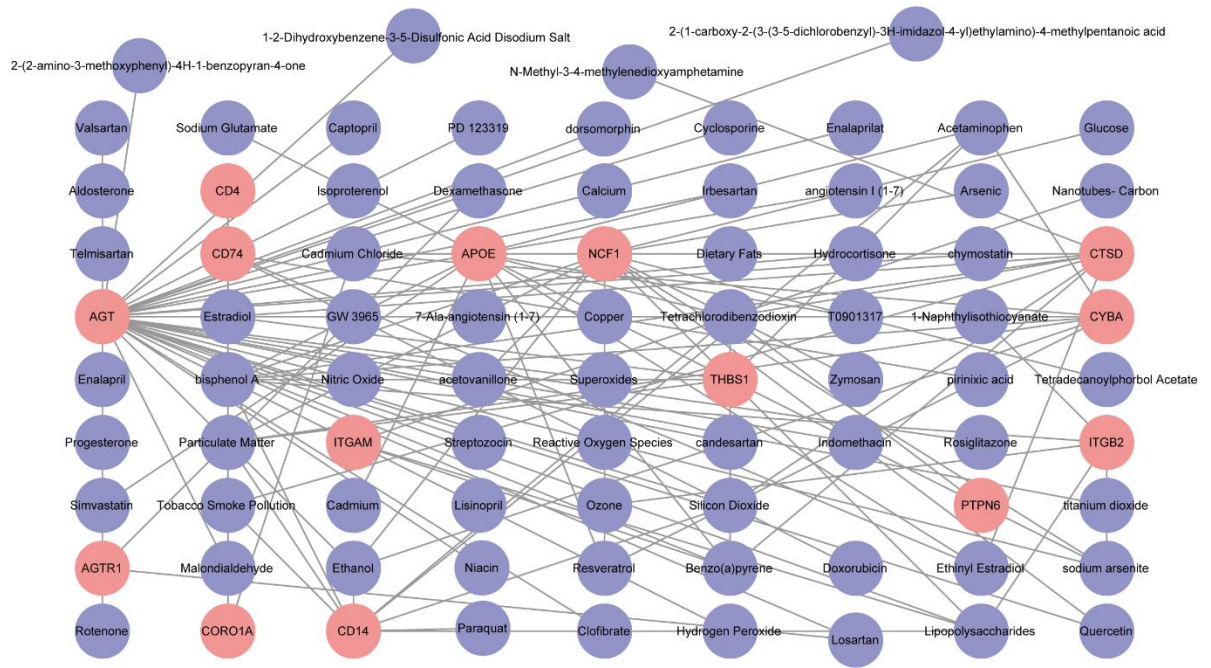

**Supplementary Fig. S3.** Construction of mRNA--drugs interaction network.

The mRNA--drugs interaction network of hub genes, the red oval block is mRNA, the blue oval block is drugs.

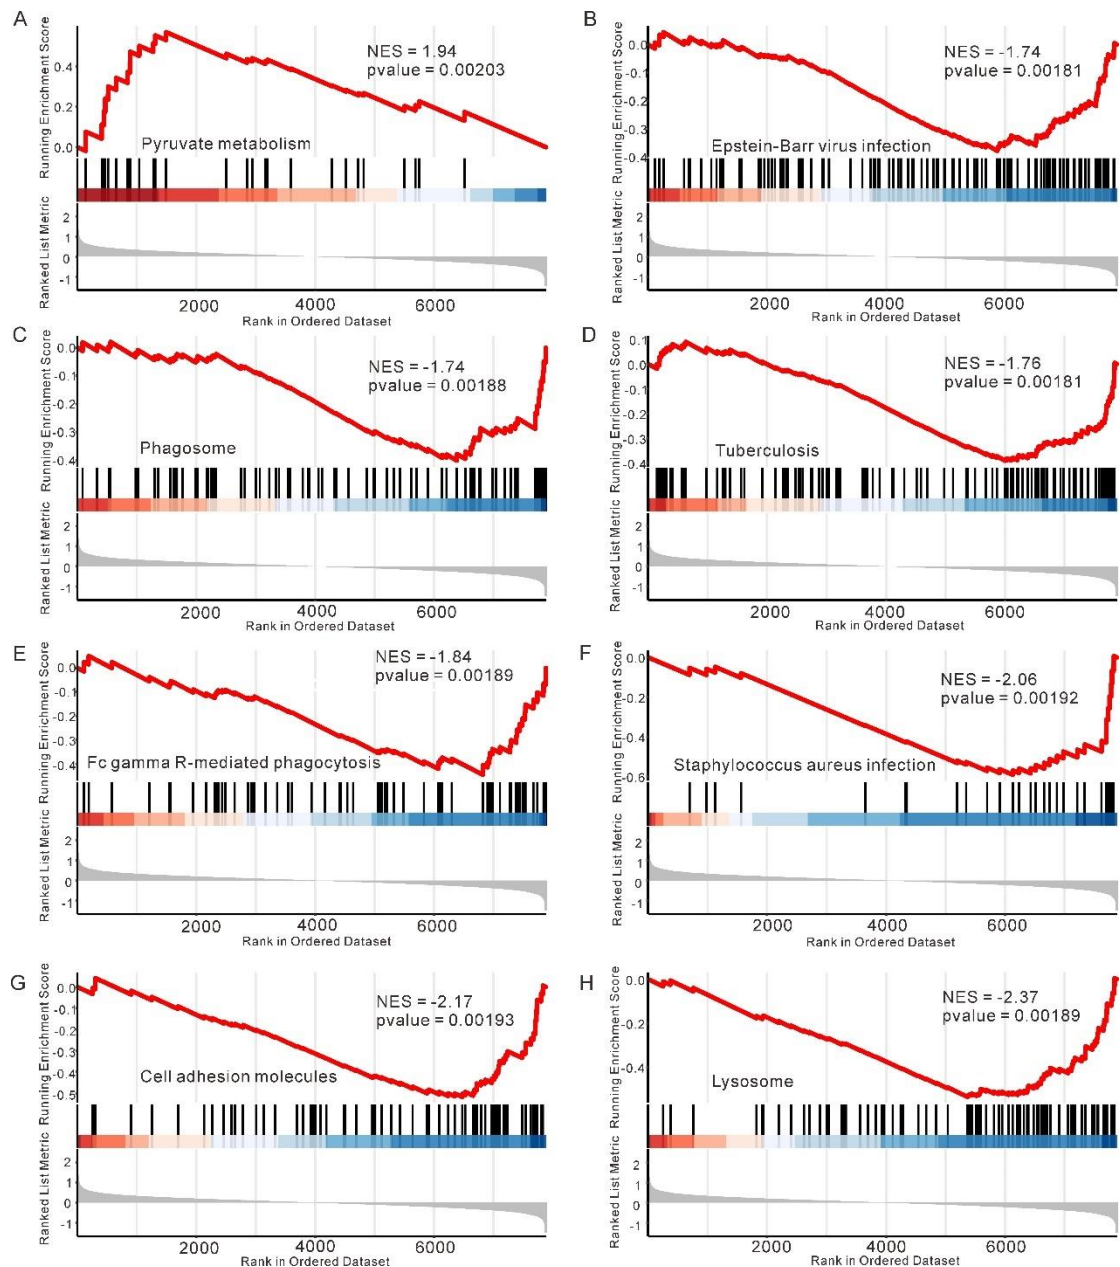

**Supplementary Fig. S4.** GSEA between High-Pyroptosis score group and Low-Pyroptosis score group. (A) Specific enrichment of the Pyruvate metabolism pathway. (B) Specific enrichment of Epstein-Barr virus infection pathway. (C) Specific enrichment of Phagosome pathway. (D) Tuberculosis pathway enrichment. (E) Enrichment of Fc gamma R-mediated phagocytosis pathway. (F) Specific enrichment of Staphylococcus aureus infection pathway. (G) Enrichment of Cell adhesion molecules pathway. (H) Specific enrichment of Lysosome pathway. (GSEA: Gene set enrichment analysis).

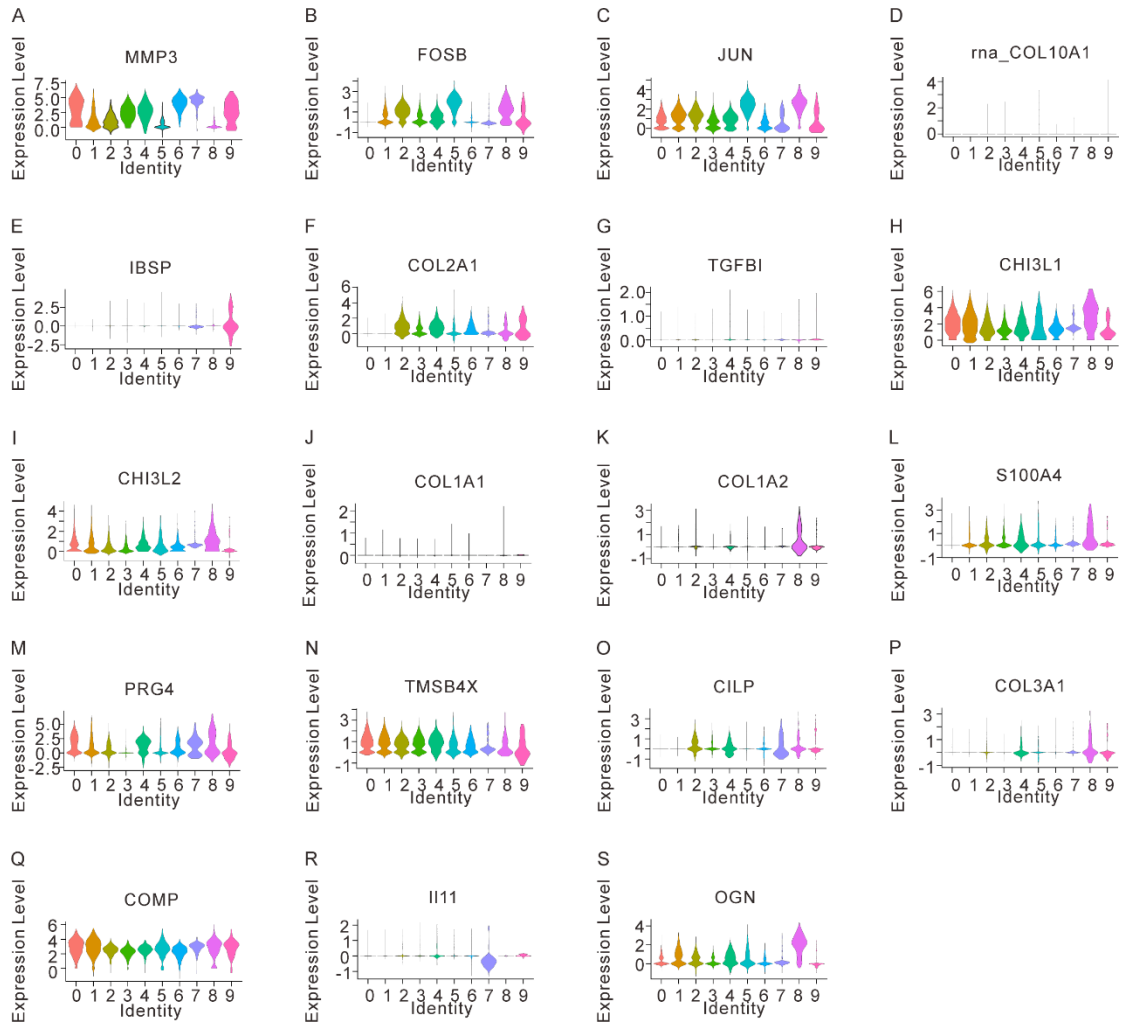

**Supplementary Fig. S5.** The expression of marker genes in 19 single-cell subgroups in different cell clusters of normal individuals.

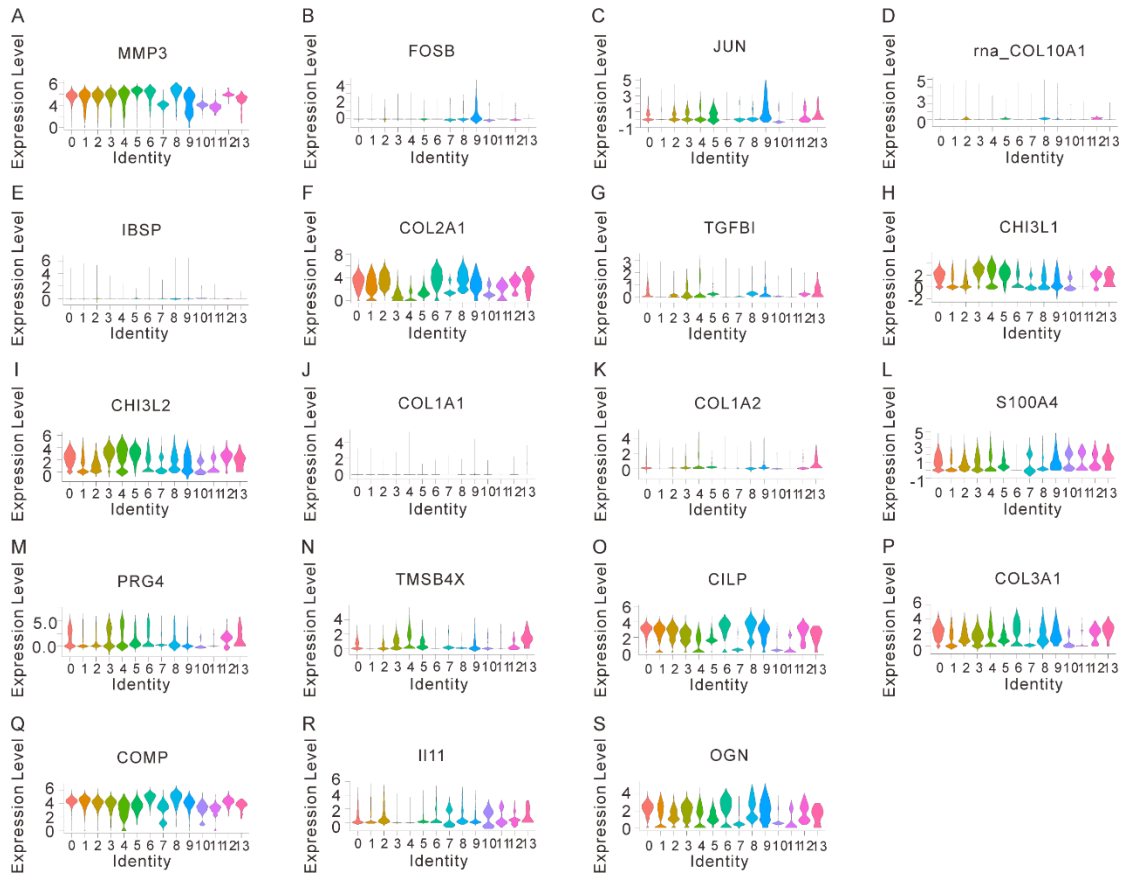

**Supplementary Fig. S6.** The expression of marker genes in 19 single-cell subgroups in different cell clusters of normal individuals.

Supplementary Table S1. A total of 238 genes containing in the MEdred module contains

---

Gene name

---

DOK3, ADAP2, TNFAIP2, COLGALT1, PSTPIP1, NCF1, ZSWIM8, IRF5, CYBA, PRR16, WAS, PYCARD, NFYB, SELPLG, LAMA2, MAN2B1, ARRB2, FZD6, AGTR1, PIK3CD, LGALS9, INPP4B, IGFLR1, PLCB4, DENND4B, TMEM47, ITGAM, RHOBTB3, VASP, ARHGAP22, ACOT11, STXBP2, COTL1, CDH19, LOX, ESPL1, STX10, NEDD9, CNN3, TBC1D2, TSPO, ADCY7, ABCC3, RGS19, TSPAN15, SLC15A3, ABCC5, GADD45A, CDC42EP3, CORO1A, PERP, UNC93B1, CD300C, ANPEP, SLC23A2, FGF18, MECOM, CALCRL, GALNT10, GIPC2, PLA2G15, GMIP, CSRP2, SEPT11, ITGB2, SMG9, MARK2, CYP7B1, SLC22A18, SLC2A6, C2, MYB, GRN, NAGA, SERPINA5, RUNDC3B, SNED1, TPCN1, RASSF4, DAPK1, SYT17, TACSTD2, TNFSF13, ADAP1, NAGK, CLN6, HOXB6, PTPN6, TXNRD2, SLC6A12, OGDH, ZDHHC24, ABCC9, SIRPA, TIAM1, KIAA0513, DSG2, GAA, PLK2, KL, CTSD, WASF3, TRPV2, SYNE2, DLX4, THEMIS2, ARHGAP29, S1PR1, RAPGEF5, ATP6V0E2, CD4, EMCN, PDGFRL, ABLIM1, ASPN, GAB1, SCRIN1, GPM6B, SPOCK1, PELI2, EHF, ERG, SLCO2A1, MCOLN1, CILP, SLC1A4, RNF144A, KLF9, DOCK9, EPHB2, DSP, DPP4, TRIM14, ANK2, S100A3, SGCE, PTPRB, CLU, PTGS1, RNASET2, PREX2, STRA6, PLTP, HSD17B14, CD14, SEMA5A, CD74, TMEM51, AJAP1, POSTN, GNG11, TUBB2B, RBMS3, SRPX, TSPAN13, TM4SF1, SVEP1, PTPRK, OSBPL10, KCNN3, SOCS2, C1orf21, SORL1, MAFF, SYNGR3, NR1H3, STEAP1B, FILIP1L, KCNE4, DIO2, STX1A, KLHL3, SPINT1, THBS1, MPDZ, RMDN3, PODXL, SIX3, AP1B1, CD200, ABCB1, FLT1, DOPEY2, RPGR, SIPA1L1, SMCO4, MTUS2, LRRN3, ARHGEF28, ADAMTS9, MYO5C, CLIC5, ANGPT2, RTN1, SMAGP, SFRP1, RPP25, FBN1, CNM4, ITM2A, CDK20, GRB10, CXCL14, TMOD2, APOE, TSPAN2, ID4, PAQR4, PTGER3, RPS6KA1, SIL1, ADAM12, MAPK13, KDR, LAMB1, YWHAH, MMP16, ZMYND10, EFNA1, FZD4, COL21A1, CA8, CHN1, CRISPLD2, PDE5A, SUS4, CARD14, DNASE2, BTC, NID1, TWIST1, BACE2, ALDH2, AGT, APOLD1, NFKBIE, DCLK1, MAP4K4

---

Supplementary Table S2. The 104 key genes

---

Gene name

---

ARRB2, NCF1, TNFSF13, CYBA, PLA2G15, SELPLG, ABCC3, DSG2, COTL1, AP1B1, CD14, PTPN6, NAGA, NR1H3, TRIM14, TRPV2, CD74, CD4, ID4, PYCARD, ITGAM, RNASET2, GRN, TBC1D2, IRF5, ANGPT2, ADAP2, C2, TMEM51, NID1, TMEM47, UNC93B1, ITGB2, MPDZ, SYNE2, CD300C, CDC42EP3, TSPAN15, CORO1A, ERG, LGALS9, TSPO, PRR16, RPS6KA1, GRB10, SYT17, DAPK1, CSRP2, STXBP2, SORL1, APOE, C1orf21, PSTPIP1, MCOLN1, ADCY7, SLC2A6, IGFLR1, FLT1, MAN2B1, LAMA2, GPM6B, SLC15A3, RNF144A, MMP16, APOLD1, COLGALT1, LRRN3, THEMIS2, CTSD, PTGS1, WASF3, FZD6, AGT, DNASE2, BTC, CNN3, PTGER3, SMC04, INPP4B, GAB1, SOCS2, RAPGEF5, KL, WAS, SCRN1, SLC6A12, DOK3, THBS1, MAPK13, ARHGAP29, ADAMTS9, MECOM, TNFAIP2, PLK2, AGTR1, MAP4K4, ABCC9, ZMYND10, HOXB6, SUSD4, PERP, PLCB4, EHF, SVEP1

---
